# Supplementary material
Source: Springer Nature journal article supplement (https://www.springermedizin.de/resource/supplementary/13256_2009_1188_MOESM1_ESM.pdf/9647200)
Supplement: MOESM1 [file 9647200]

# Results of Mixing Study

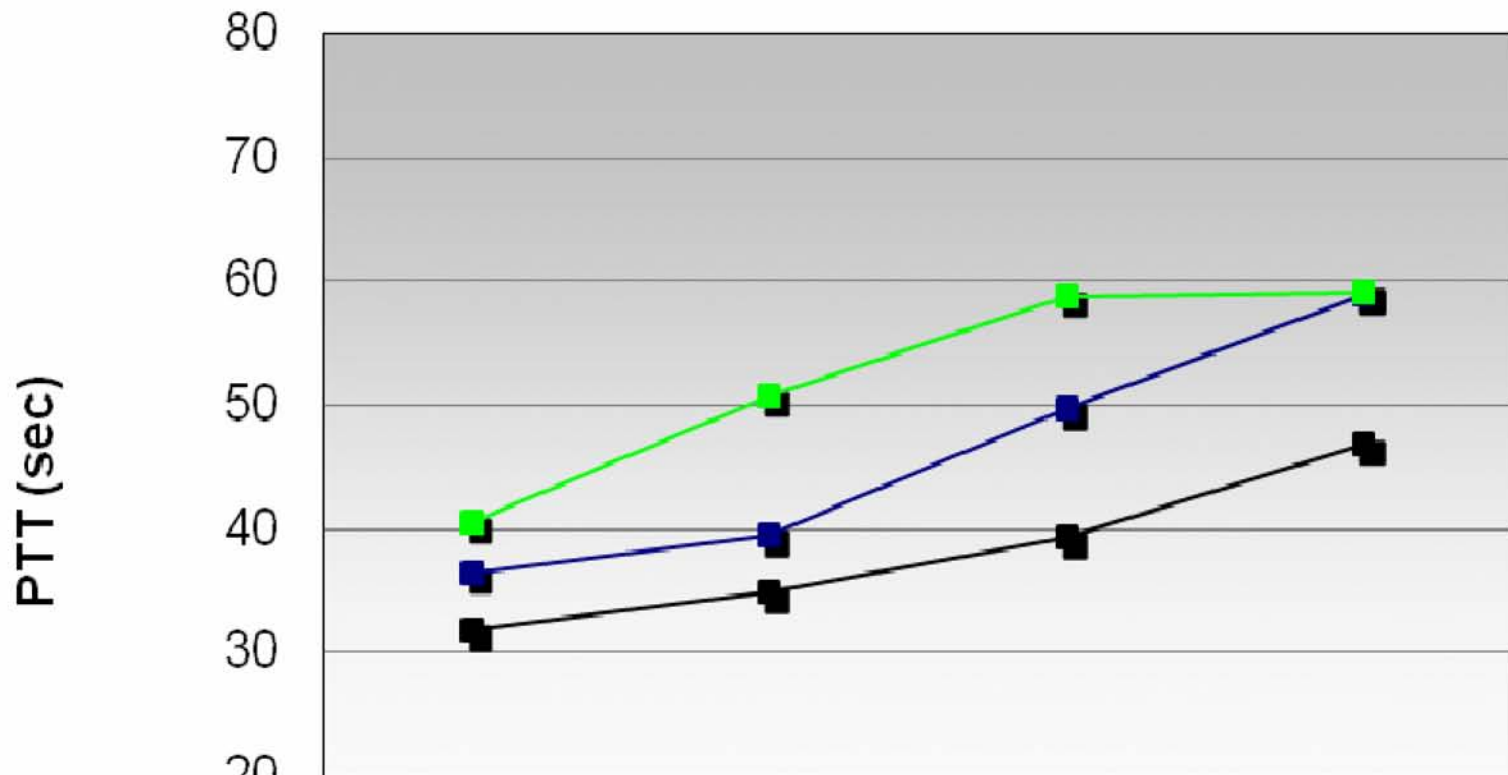

|  | Immediate | 0.5 h | 1 hr | 2 hr |
|--|-----------|-------|------|------|
|--|-----------|-------|------|------|

|                                          |      |      |      |      |
|------------------------------------------|------|------|------|------|
| ■ Patient Plasma/Normal Plasma 1:1 ratio | 36.4 | 39.4 | 49.6 | 58.9 |
|------------------------------------------|------|------|------|------|

|                                          |      |      |      |      |
|------------------------------------------|------|------|------|------|
| ■ Patient Plasma/Normal Plasma 1:1 ratio | 36.4 | 39.4 | 49.6 | 58.9 |
|------------------------------------------|------|------|------|------|

|                                          |      |      |      |      |
|------------------------------------------|------|------|------|------|
| ■ Patient Plasma/Normal Plasma 1:1 ratio | 36.4 | 39.4 | 49.6 | 58.9 |
|------------------------------------------|------|------|------|------|

|                                          |      |      |      |      |
|------------------------------------------|------|------|------|------|
| ■ Patient Plasma/Normal Plasma 1:1 ratio | 36.4 | 39.4 | 49.6 | 58.9 |
|------------------------------------------|------|------|------|------|

|                                          |      |      |      |      |
|------------------------------------------|------|------|------|------|
| ■ Patient Plasma/Normal Plasma 1:1 ratio | 36.4 | 39.4 | 49.6 | 58.9 |
|------------------------------------------|------|------|------|------|

|                                          |      |      |      |      |
|------------------------------------------|------|------|------|------|
| ■ Patient Plasma/Normal Plasma 4:1 ratio | 40.5 | 50.7 | 58.7 | 59.1 |
|------------------------------------------|------|------|------|------|

|                                          |      |      |      |      |
|------------------------------------------|------|------|------|------|
| ■ Patient Plasma/Normal Plasma 4:1 ratio | 40.5 | 50.7 | 58.7 | 59.1 |
|------------------------------------------|------|------|------|------|

|                                          |      |      |      |      |
|------------------------------------------|------|------|------|------|
| ■ Patient Plasma/Normal Plasma 4:1 ratio | 40.5 | 50.7 | 58.7 | 59.1 |
|------------------------------------------|------|------|------|------|

|                                          |      |      |      |      |
|------------------------------------------|------|------|------|------|
| ■ Patient Plasma/Normal Plasma 4:1 ratio | 40.5 | 50.7 | 58.7 | 59.1 |
|------------------------------------------|------|------|------|------|

|                                          |      |      |      |      |
|------------------------------------------|------|------|------|------|
| ■ Patient Plasma/Normal Plasma 4:1 ratio | 40.5 | 50.7 | 58.7 | 59.1 |
|------------------------------------------|------|------|------|------|

|                                          |      |      |      |      |
|------------------------------------------|------|------|------|------|
| ■ Patient Plasma/Normal Plasma 1:4 ratio | 31.7 | 34.8 | 39.2 | 46.8 |
|------------------------------------------|------|------|------|------|

|                                          |      |      |      |      |
|------------------------------------------|------|------|------|------|
| ■ Patient Plasma/Normal Plasma 1:4 ratio | 31.7 | 34.8 | 39.2 | 46.8 |
|------------------------------------------|------|------|------|------|

|                                          |      |      |      |      |
|------------------------------------------|------|------|------|------|
| ■ Patient Plasma/Normal Plasma 1:4 ratio | 31.7 | 34.8 | 39.2 | 46.8 |
|------------------------------------------|------|------|------|------|

|                                          |      |      |      |      |
|------------------------------------------|------|------|------|------|
| ■ Patient Plasma/Normal Plasma 1:4 ratio | 31.7 | 34.8 | 39.2 | 46.8 |
|------------------------------------------|------|------|------|------|

|                                          |      |      |      |      |
|------------------------------------------|------|------|------|------|
| ■ Patient Plasma/Normal Plasma 1:4 ratio | 31.7 | 34.8 | 39.2 | 46.8 |
|------------------------------------------|------|------|------|------|
